# Supplementary material for: Balance between maternal antiviral response and placental transfer of protection in gestational SARS-CoV-2 infection
Source: PubMed Central journal article supplement (PMC10544212; doi:10.1172/jci.insight.167140), 2023-09-08
Supplement: jciinsight-8-167140-s009.pdf [file jciinsight-8-167140-s009.pdf]

Figure S1

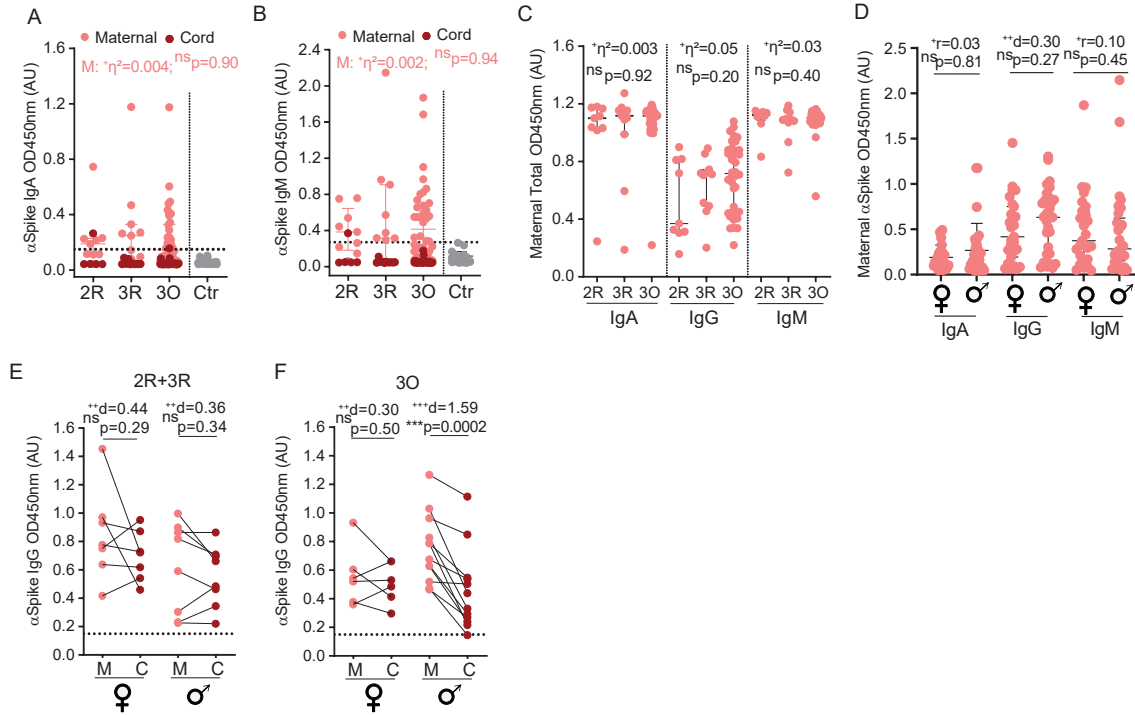

**Figure S1- Antibody levels in maternal:neonate dyads segregated by neonate sex and symptomatology.**

(A) Anti-spike IgA in maternal and cord blood of recovered (2R, 3R) and ongoing (3O) infection (CoV-2+, n=60) and non-infected controls (CoV-2-, n=12), measured by absorbance at 450 nm (OD450) in arbitrary units (AU).

(B) Anti-spike IgM as in (A).

(C) Total IgA, IgG and IgM antibody levels segregated by gestational period of infection (n=58).

(D) Anti-spike IgA, IgG and IgM in maternal CoV-2+ plasma according to neonate sex (n=56).

(E) Paired dyads analysis of anti-spike IgG in recovered (2R+3R) maternal infection according to neonate sex (n=15)

(F) Paired dyads analysis of anti-spike IgG in ongoing (3O) maternal infection according to neonate sex (n=18).

Dashed line indicates assay cutoff. Data represents mean  $\pm$  SD for parametric tests, or median  $\pm$  IQR for non-parametric tests. p values \*\*\*p < 0.001; ns, not significant were determined by Kruskal-Wallis test (A-C), unpaired t test (D), Mann-Whitney test (D) and parametric paired t test (E, F). Effect sizes were determined by  $\eta^2$  = eta-squared (A-C), d = Cohen's d (D-F) and r = correlation coefficient r (D).

Figure S2

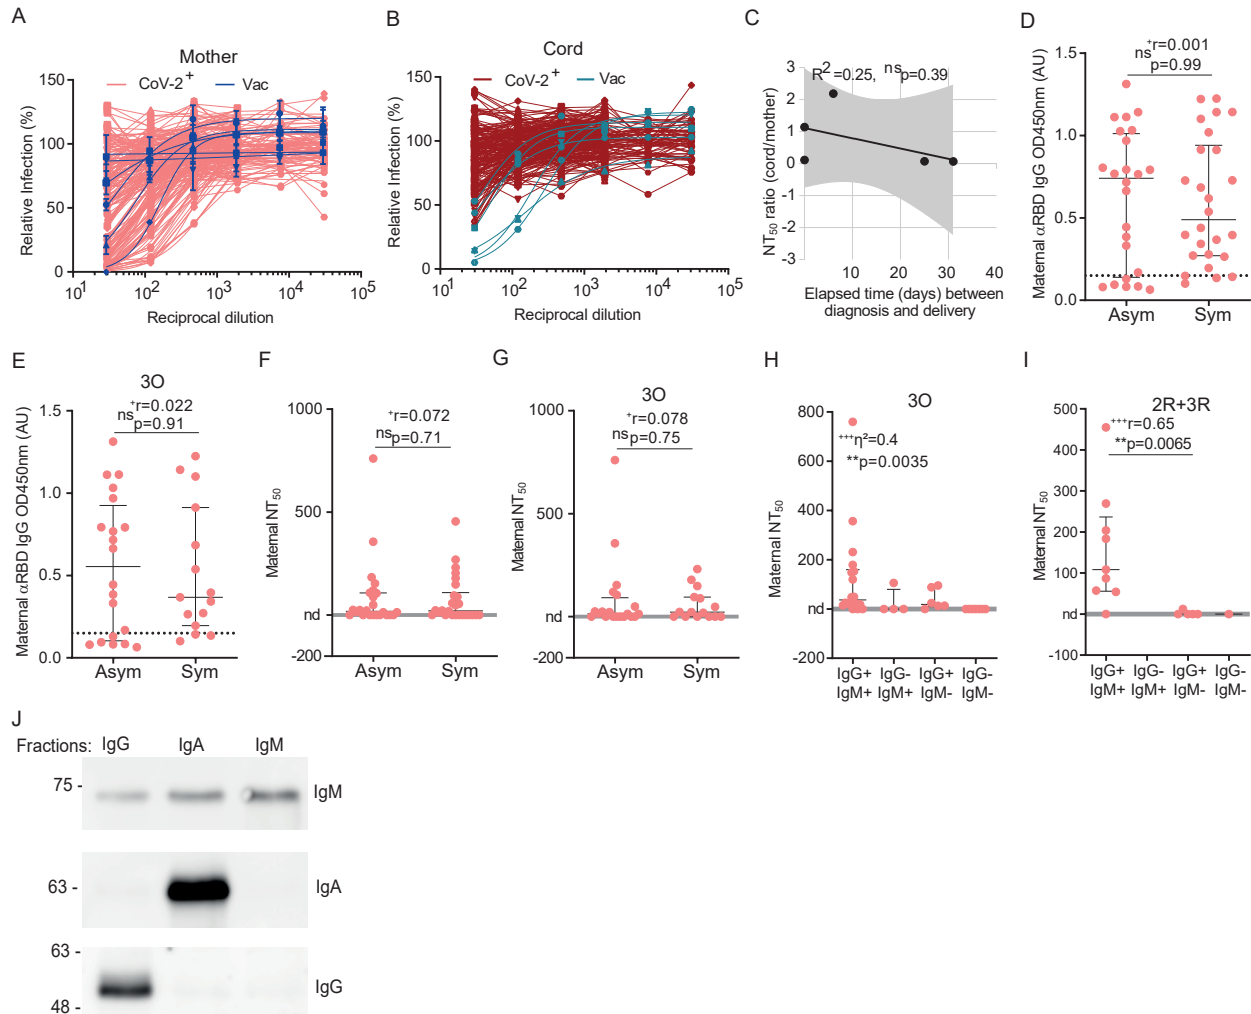

**Figure S2- Neutralizing antibody levels in maternal:neonate dyads.**

(A) Neutralization curves for maternal plasma from SARS-CoV-2 positive (CoV-2+, n = 50) and vaccinated (Vac, n = 6) individuals.

(B) Neutralization curves for cord plasma from SARS-CoV-2 positive (CoV-2+, n = 50) and vaccinated (Vac, n = 6) individuals.

(C) Correlation between NT<sub>50</sub> transfer ratio and elapsed time between diagnosis and delivery (n=5).

(D) Anti-RBD IgG in asymptomatic (Asym) and symptomatic (Sym) CoV-2+ participants (n=50).

(E) Anti-RBD IgG in asymptomatic (Asym) and symptomatic (Sym) in ongoing maternal infections (n=35).

(F) NT<sub>50</sub> in asymptomatic (Asym) and symptomatic (Sym) maternal infection (n = 50).

(G) NT<sub>50</sub> in asymptomatic (Asym) and symptomatic (Sym) in ongoing maternal infections (3O, n = 35).

(H) Maternal NT<sub>50</sub> in function of the presence of anti-spike IgG and/or IgM antibodies in ongoing infections (3O, n = 35).

(I) Maternal NT<sub>50</sub> in function of the presence of anti-spike IgG and/or IgM antibodies in recovered infections (2R+3R, n = 15).

(J) Western blot for detection of IgM, IgA and IgG immunoglobulins in purified IgG, IgA and IgM fractions.

Dashed line indicates assay cutoff. nd: not detectable. Data represents median  $\pm$  IQR for non-parametric tests. p values  $**p < 0.01$ ; ns, not significant were determined by Pearson correlation (C), Mann-Whitney test (D-G, I) and Kruskal-Wallis test (H). Effect sizes were determined by  $r =$  correlation coefficient (D-G, I) and  $\eta^2 =$  eta-squared (H).

Figure S3

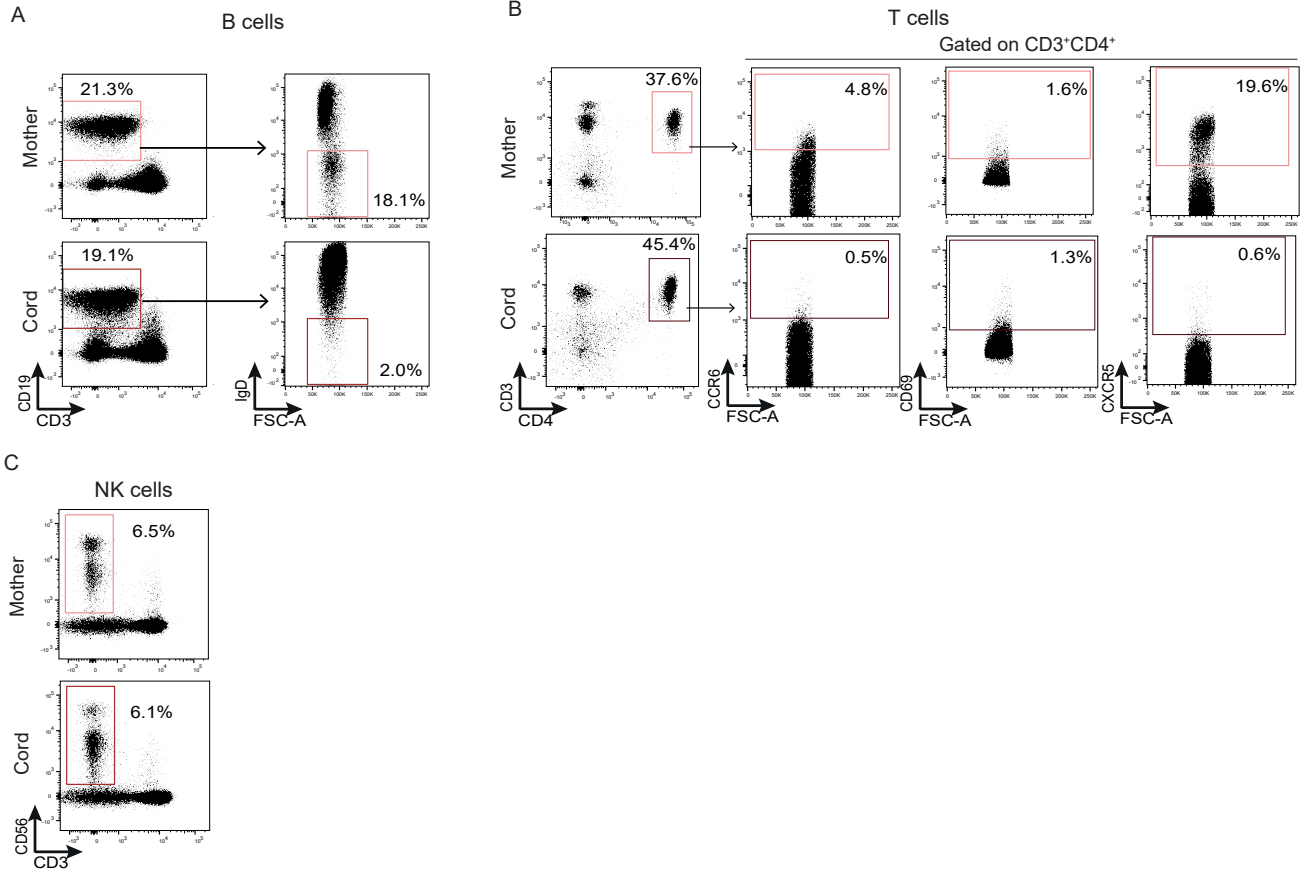

**Figure S3- Flow cytometric gating strategy.**

(A-C) Gating strategy for (A) CD3-CD19+IgD- B cells; (B) CD3+CD4+CCR6+, CD3+CD4+CD69+ and CD3+CD4+CXCR5+ T cells; (C) CD3-CD56+ NK cells in maternal and cord blood samples.

Figure S4

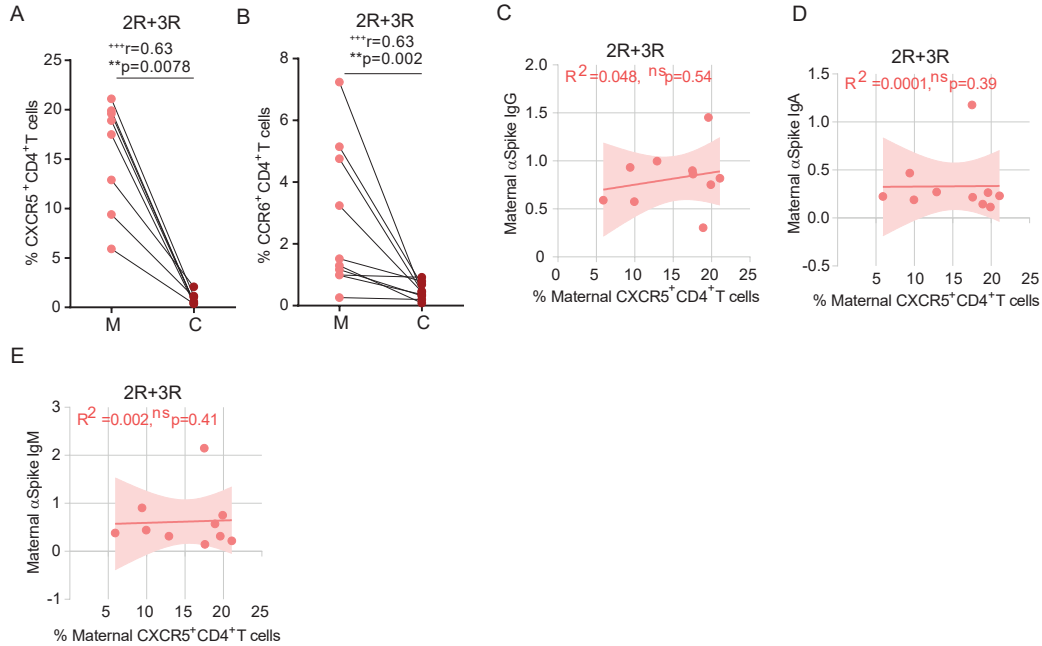

**Figure S4- Long-term expansion of CXCR5+CD4+ T cells in maternal SARS-CoV-2 infection.**

(A) Paired dyad analysis of the frequency of CXCR5+CD4+ T cells in SARS-CoV-2 recovered participants (2R+3R, n=8).

(B) As in (A) for CCR6+CD4+ T cells (2R+3R, n=10).

(C) Correlation between anti-spike IgG and the frequency of CXCR5+CD4+ T cells in recovered maternal infection (2R+3R, n = 10).

(D) As in (C) for maternal anti-spike IgA levels (2R+3R, n = 10).

(E) As in (C) for maternal anti-spike IgM levels (2R+3R, n = 10).

p values \*\*p < 0.01; ns, not significant were determined by non-parametric paired Wilcoxon test (A, B), Pearson correlation (C) and Spearman correlation (D, E). Effect sizes were determined by r = correlation coefficient r (A, B).

Figure S5

A

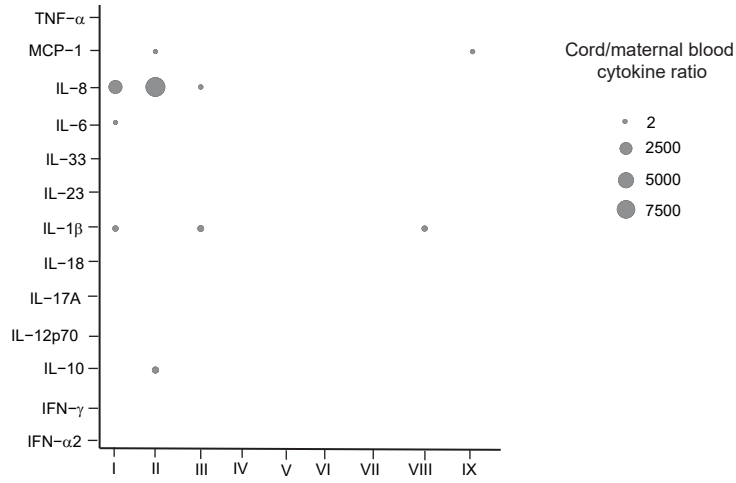

**Figure S5- Inflammatory profile in the plasma of non-infected non-vaccinated mother:neonate dyads, in uninfected and non-vaccinated participants.**

(A)- Ratio between the concentration of the cytokines IFN- $\alpha$ 2, IFN- $\gamma$ , IL-17A, IL-1 $\beta$ , IL-33, IL-6, TNF- $\alpha$ , IL-18, IL-10, IL-12p70, IL-23, IL-8, and MCP-1 in the cord blood and in the maternal blood in non-infected and unvaccinated pregnant women (n = 9).

**Table S1:** Demographic and clinical data of pregnant women infected with SARS-CoV-2 (CoV-2<sup>+</sup>) categorized between asymptomatic and symptomatic.

|                                           | <b>Asymptomatic (n = 30)</b> | <b>Symptomatic (n = 30)</b> |
|-------------------------------------------|------------------------------|-----------------------------|
| <b>Age categories n (%)</b>               |                              |                             |
| 18-26                                     | 9 (30%)                      | 7 (23.3%)                   |
| 27-33                                     | 11 (36.7%)                   | 15 (50%)                    |
| 34-40                                     | 10 (33.3%)                   | 8 (26.7%)                   |
| <b>Ethnicity n (%)</b>                    |                              |                             |
| Black                                     | 9 (30%)                      | 4 (13.3%)                   |
| Asian                                     | 9 (30%)                      | 3 (10%)                     |
| White                                     | 11 (36.7%)                   | 21 (70%)                    |
| Romani                                    | 0                            | 1 (3.3%)                    |
| Unretrieved                               | 1 (3.3%)                     | 1 (3.3%)                    |
| <b>Comorbidities n (%)</b>                |                              |                             |
| Anaemia                                   | 3 (10%)                      | 1 (3.3%)                    |
| Cardiovascular diseases                   | 2 (6.7%)                     | 1 (3.3%)                    |
| Endocrine System                          | 2 (6.7%)                     | 2 (6.7%)                    |
| Pulmonary diseases                        | 0                            | 4 (13.3%)                   |
| Obesity                                   | 3 (10%)                      | 4 (13.3%)                   |
| Others                                    | 2 (6.7%)                     | 3 (10%)                     |
| None                                      | 18 (60%)                     | 15 (50%)                    |
| <b>Delivery Mode n (%)</b>                |                              |                             |
| Vaginal                                   | 9 (30%)                      | 10 (33.3)                   |
| Caesarean                                 | 17 (56.7%)                   | 13 (43.3%)                  |
| Forceps                                   | 3 (10%)                      | 7 (23.3)                    |
| Unretrieved                               | 1 (3.3%)                     | 0                           |
| <b>Cord Clamping n (%)</b>                |                              |                             |
| Delayed                                   | 14 (46.7%)                   | 14 (46.7%)                  |
| Immediate                                 | 10 (33.3%)                   | 12 (40%)                    |
| Unknown                                   | 6 (20%)                      | 4 (13.3%)                   |
| <b>SARS-CoV-2 positive PCR in mothers</b> | 100%                         | 100%                        |
| <b>SARS-CoV-2 PCR in new-born n (%)</b>   |                              |                             |
| Negative                                  | 26 (86.7%)                   | 20 (66.7%)                  |
| Positive                                  | 2 (6.7%)                     | 1 (3.3%)                    |
| No PCR                                    | 2 (6.7%)                     | 9 (30%)                     |
| <b>Sex new-born n (%)</b>                 |                              |                             |
| Female                                    | 14 (46.7%)                   | 14 (46.7%)                  |
| Male                                      | 16 (53.3%)                   | 14 (46.7%)                  |
| Unretrieved                               | 0                            | 2 (6.7%)                    |

|                                            |            |            |
|--------------------------------------------|------------|------------|
| <b>Weight new-born, g, n (%)</b>           |            |            |
| <2500                                      | 2 (6.7%)   | 3 (10%)    |
| 2501-3000                                  | 13 (43.3%) | 9 (30%)    |
| 3001-4000                                  | 14 (46.7%) | 15 (50%)   |
| >4000                                      | 1 (3.3%)   | 2 (6.7%)   |
| Unretrieved                                | 0          | 1 (3.3%)   |
| <b>Diagnostic Trimester n (%)</b>          |            |            |
| Second (recovered at delivery) - 2R        | 3 (10%)    | 6 (20%)    |
| Third (recovered at delivery) - 3R         | 2 (6.7%)   | 9 (30%)    |
| Third (ongoing infection at delivery) - 3O | 25 (83.3%) | 15 (50%)   |
| <b>Sick Contact n (%)</b>                  |            |            |
| Yes                                        | 10 (33.3%) | 9 (30%)    |
| No                                         | 18 (60%)   | 21 (70%)   |
| Unknown                                    | 2 (6.7%)   | 0          |
| <b>Invasive Ventilation n (%)</b>          |            |            |
| Yes                                        | 0          | 1 (3.3%)   |
| No                                         | 29 (96.7%) | 29 (96.7%) |
| Unknown                                    | 1 (3.3%)   | 0          |
| <b>Oxygen Support n (%)</b>                |            |            |
| Yes                                        | 0          | 4 (13.3%)  |
| No                                         | 29 (96.7%) | 26 (86.7%) |
| Unknown                                    | 1 (3.3%)   | 0          |
| <b>Imaging of Pneumonia n (%)</b>          |            |            |
| Yes                                        | 0          | 4 (13.3%)  |
| No                                         | 28 (93.3%) | 26 (86.7%) |
| Unknown                                    | 2 (6.7%)   | 0          |
| <b>COVID-19 hospitalization n (%)</b>      |            |            |
| Yes – intensive care                       | 0          | 1 (3.3%)   |
| Yes – no intensive care                    | 0          | 3 (10%)    |
| No                                         | 28 (93.3%) | 26 (86.7%) |
| Unknown                                    | 2 (6.7%)   | 0          |

**Table S2:** Demographic and clinical data of pregnant women negative for SARS-CoV-2 (CoV-2).

| <b>SARS-CoV-2 negative PCR in mothers</b> | <b>n=12</b> |
|-------------------------------------------|-------------|
| <b>Age Categories n (%)</b>               |             |
| 18-26                                     | 2 (16.7%)   |
| 27-33                                     | 5 (41.7%)   |
| 34-40                                     | 5 (41.7%)   |
| <b>Ethnicity n (%)</b>                    |             |
| Black                                     | 3 (25%)     |
| Asian                                     | 1 (8.3%)    |
| White                                     | 7 (58.3%)   |
| Unretrieved                               | 1 (8.3%)    |
| <b>Delivery Mode n (%)</b>                |             |
| Vaginal                                   | 4 (33.3%)   |
| Caesarean                                 | 7 (58.3%)   |
| Forceps                                   | 1 (8.3%)    |
| <b>Sex new-born n (%)</b>                 |             |
| Female                                    | 3 (25%)     |
| Male                                      | 9 (75%)     |
| <b>Weight new-born, g, n (%)</b>          |             |
| <2500                                     | 1 (8.3%)    |
| 2501-3000                                 | 1 (8.3%)    |
| 3001-4000                                 | 10 (83.3%)  |



**Table S3:** Demographic and clinical data of pregnant women vaccinated with mRNA COVID-19 BNT162b vaccine.

|                                                      |           |
|------------------------------------------------------|-----------|
| <b>Vaccinated mothers with mRNA COVID-19 vaccine</b> | n=9       |
| <b>Age Categories n (%)</b>                          |           |
| 18-26                                                | 0         |
| 27-33                                                | 4 (44.4%) |
| 34-40                                                | 5 (55.6%) |
| <b>Ethnicity n (%)</b>                               |           |
| White                                                | 9 (100%)  |
| <b>Delivery Mode n (%)</b>                           |           |
| Vaginal                                              | 2 (22.2%) |
| Caesarean                                            | 3 (33.4%) |
| Forceps                                              | 2 (22.2%) |
| Unretrieved                                          | 2 (22.2%) |
| <b>Sex new-born n (%)</b>                            |           |
| Female                                               | 3 (33.4%) |
| Male                                                 | 4 (44.4%) |
| Unretrieved                                          | 2 (22.2%) |
| <b>Weight new-born, g, n (%)</b>                     |           |
| <2500                                                | 0         |
| 2501-3000                                            | 2 (22.2%) |
| 3001-4000                                            | 4 (44.4%) |
| >4000                                                | 1 (11.2%) |
| Unretrieved                                          | 2 (22.2%) |
